# Supplementary material for: Pathogenesis of Rift Valley Fever Virus in a BALB/c Mouse Model Is Affected by Virus Culture Conditions and Sex of the Animals
Source: MDPI journal article supplement (doi:10.3390/v15122369), 2023-11-30
Supplement: s1 [file s1]

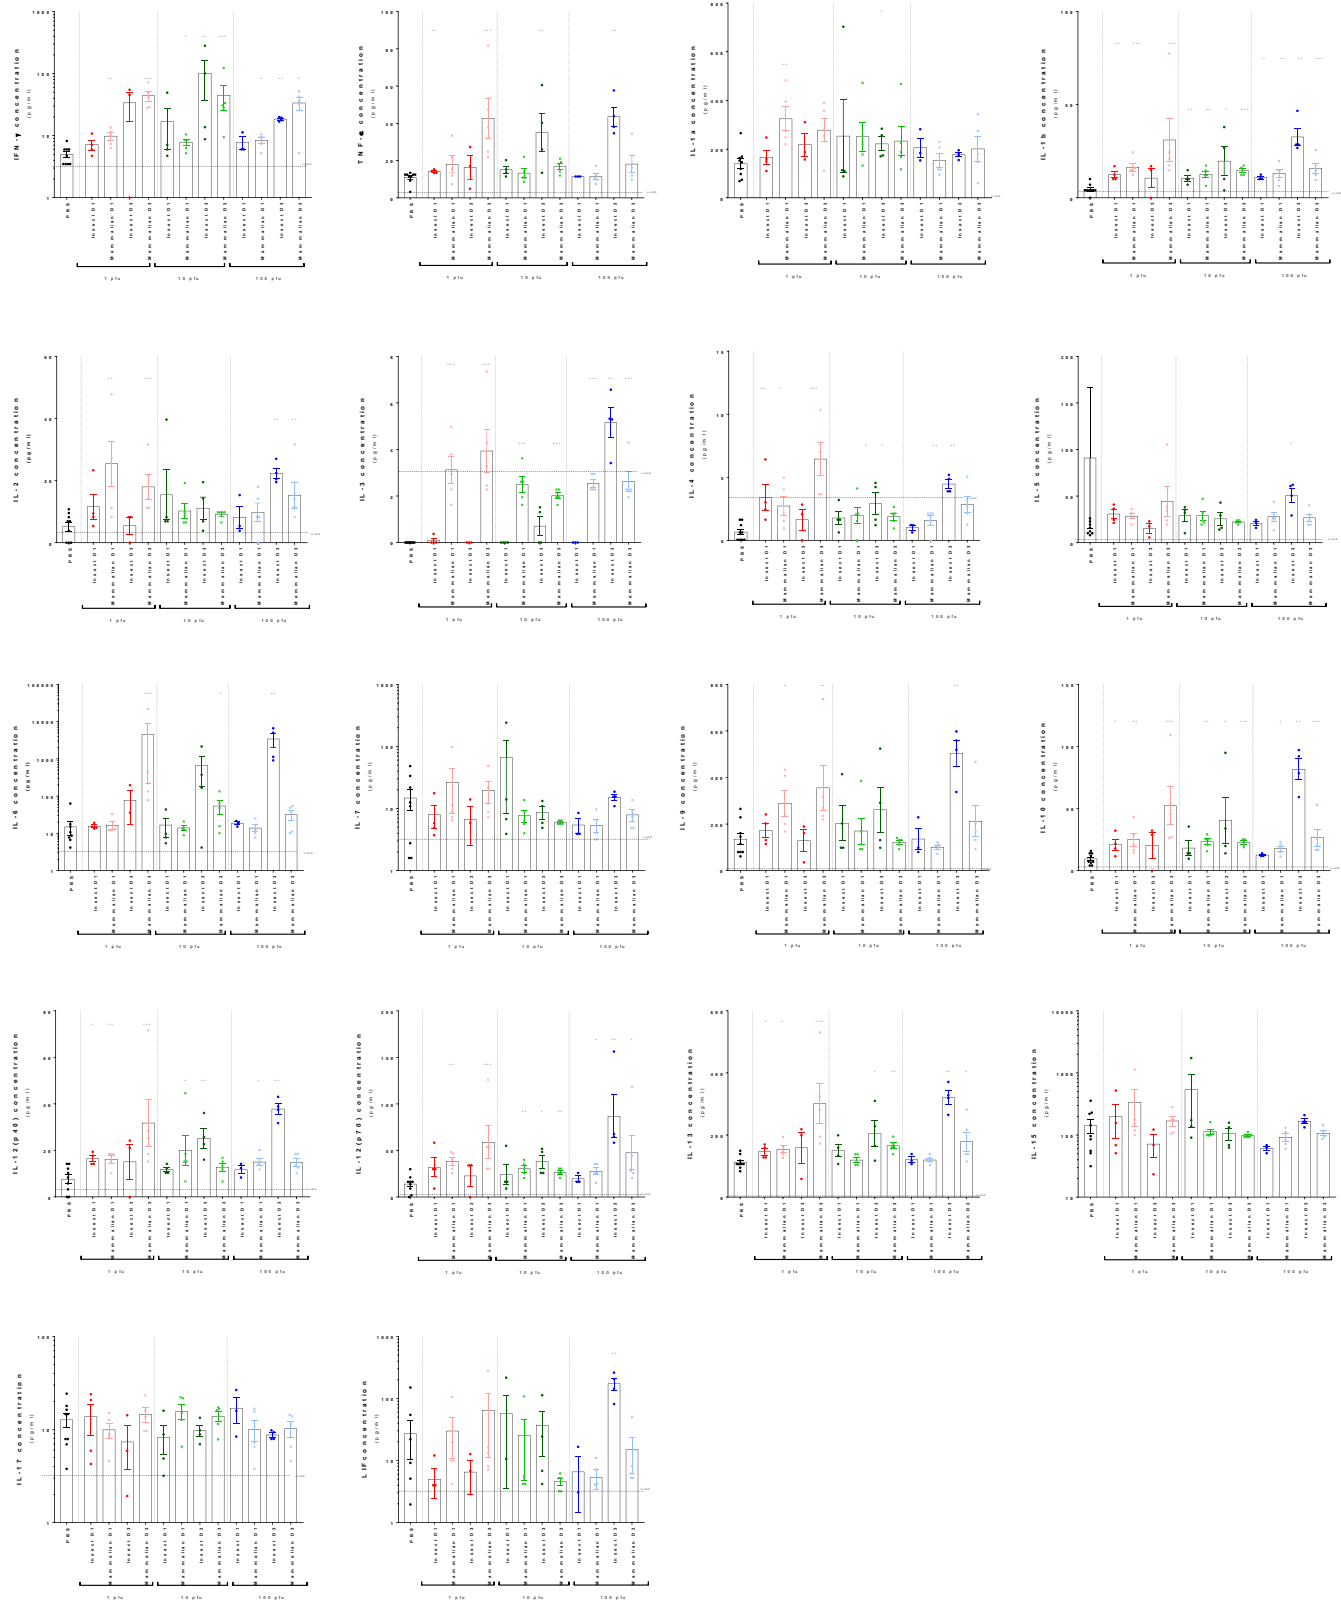

**Supplementary figure S1.** Cytokine levels in animals challenged with 1, 10 or 100 pfu insect or mammalian cell derived RVFV on day 1 and 3 post-challenge. Significant difference to PBS control group denoted by \* (P<0.05), \*\* (P<0.01) or \*\*\* (P<0.001).

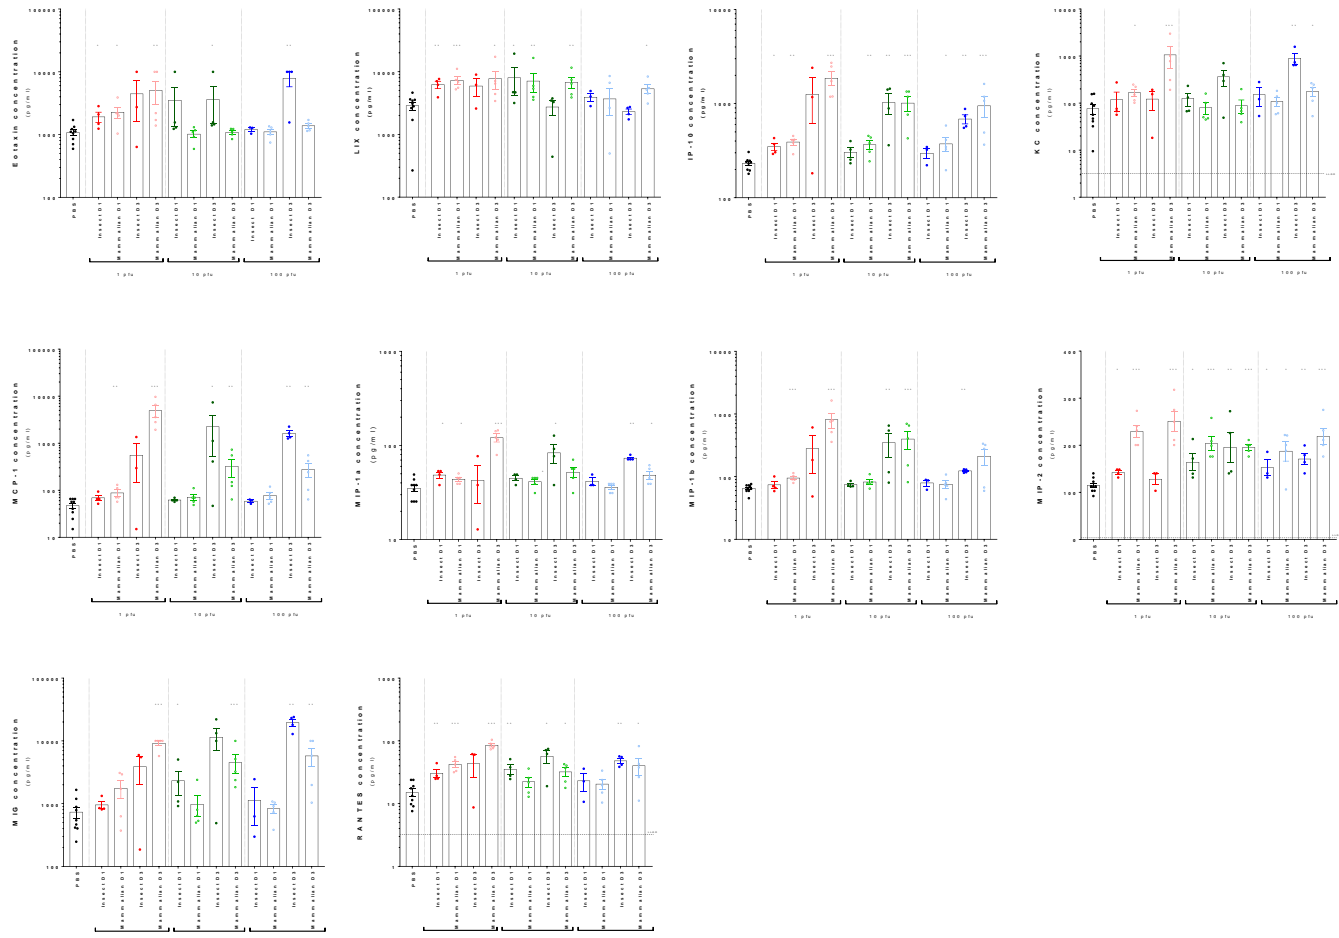

**Supplementary figure S2.** Chemokine levels in animals challenged with 1, 10 or 100 pfu insect or mammalian cell derived RVFV on day 1 and 3 post-challenge. Significant difference to PBS control group denoted by \* ( $P<0.05$ ), \*\* ( $P<0.01$ ) or \*\*\* ( $P<0.001$ ).

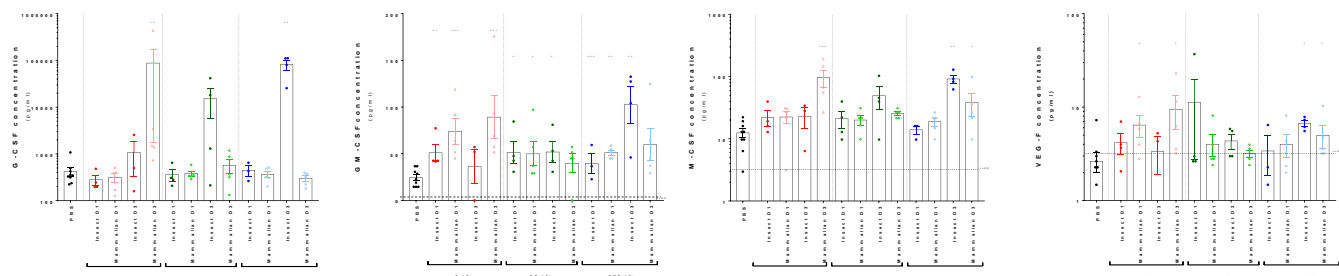

**Supplementary figure S3.** Growth factor levels in animals challenged with 1, 10 or 100 pfu insect or mammalian cell derived RVFV on day 1 and 3 post-challenge. Significant difference to PBS control group denoted by \* ( $P<0.05$ ), \*\* ( $P<0.01$ ) or \*\*\* ( $P<0.001$ ).
